# Supplementary material for: The Efficacy of a Trivalent Inactivated Salmonella Vaccine Combined with the Live S. Gallinarum 9R Vaccine in Young Layers after Experimental Infections with S. Enteritidis, S. Typhimurium, and S. Infantis
Source: Vaccines (Basel). 2022 Jul 12;10(7):1113. doi: 10.3390/vaccines10071113 (PMC9323758; doi:10.3390/vaccines10071113)
Supplement: Supplementary file 1 [file vaccines-10-01113-s001.zip › vaccines-1777321-supplementary.pdf]

**Table S1.** Pre-trials to establish the minimum infective dose 100%. Twelve-week-old birds were orally inoculated by gavage into the crop with 0.5 mL of one of the correspondent inocula. Birds were sampled by cloacal swabbing and euthanized. Livers, spleens, and caecum content were cultured. For each sample, five log10 dilutions were prepared.

| Number of Trial / <i>Salmonella</i> Strain | Inoculation Dose    | Bird Wing-Tag Number | Number of Positive Tubes |        |                 | Cloacal Swabs<br>(Day Post-Inoculation) |       |
|--------------------------------------------|---------------------|----------------------|--------------------------|--------|-----------------|-----------------------------------------|-------|
|                                            |                     |                      | Liver                    | Spleen | Caecum Contents | Day 3                                   | Day 5 |
|                                            |                     |                      |                          |        |                 |                                         |       |
| Trial 1 <i>Salmonella</i> Enteritidis      | 1 x 10 <sup>9</sup> | 20                   | +++                      | +++    | ++++++          | +                                       | +     |
|                                            |                     | 4559                 | ++                       | +++    | ++++++          | +                                       | +     |
|                                            |                     | 4580                 | +++                      | +++    | ++++++          | +                                       | +     |
|                                            |                     | 8114                 | +++                      | +++    | ++++            | +                                       | +     |
|                                            |                     | 8123                 | +++                      | +++    | ++++++          | +                                       | +     |
|                                            | 1 x 10 <sup>8</sup> | 12                   | ++                       | +++    | ++++++          | +                                       | +     |
|                                            |                     | 18                   | +++                      | +++    | ++++++          | +                                       | +     |
|                                            |                     | 4541                 | +++                      | ++     | +++++           | +                                       | +     |
|                                            |                     | 4574                 | +++                      | +++    | ++++            | +                                       | +     |
|                                            |                     | 4586                 | +++                      | +++    | ++              | +                                       | +     |
|                                            | 1 x 10 <sup>7</sup> | 2006                 | ++                       | +++    | ++++++          | +                                       | +     |
|                                            |                     | 2015                 | +++                      | +++    | ++++++          | +                                       | +     |
|                                            |                     | 4546                 | +++                      | ++     | ++              | +                                       | +     |
|                                            |                     | 6105                 | +++                      | +++    | ++++++          | +                                       | +     |
|                                            |                     | 6129                 | ++                       | +++    | -               | +                                       | +     |
| Trial 2 <i>Salmonella</i> Typhimurium      | 1 x 10 <sup>9</sup> | 4413                 | +                        | -      | +++             | +                                       | ND    |
|                                            |                     | 4436                 | -                        | +      | +++             | +                                       | ND    |
|                                            |                     | 4448                 | -                        | -      | +++             | +                                       | ND    |
|                                            |                     | 4452                 | -                        | -      | +++             | +                                       | ND    |
|                                            |                     | 4473                 | +                        | +      | +++             | +                                       | ND    |
|                                            | 1 x 10 <sup>8</sup> | 4424                 | -                        | +      | +               | +                                       | ND    |
|                                            |                     | 4469                 | -                        | -      | +++             | +                                       | ND    |
|                                            |                     | 4472                 | -                        | -      | +++             | +                                       | ND    |
|                                            |                     | 4492                 | -                        | -      | +++             | +                                       | ND    |
|                                            |                     | 4499                 | -                        | -      | +++             | +                                       | ND    |
|                                            | 1 x 10 <sup>7</sup> | 4495                 | -                        | -      | -               | +                                       | ND    |
|                                            |                     | 4500                 | -                        | -      | -               | +                                       | ND    |
|                                            |                     | 4410                 | -                        | -      | -               | -                                       | ND    |
|                                            |                     | 4463                 | -                        | -      | -               | -                                       | ND    |

|                                    |                     |      |       |       |       |   |    |
|------------------------------------|---------------------|------|-------|-------|-------|---|----|
| Trial 3 <i>Salmonella</i> Infantis | 1 x 10 <sup>9</sup> | 4445 | -     | -     | +     | + | ND |
|                                    |                     | 11   | ++++  | +++++ | +++   | - | ND |
|                                    |                     | 12   | +++++ | +++++ | ++++  | + | ND |
|                                    |                     | 13   | ++++  | +++++ | ++++  | - | ND |
|                                    |                     | 14   | +++++ | +++++ | -     | + | ND |
|                                    | 1 x 10 <sup>8</sup> | 15   | +     | +++++ | ++++  | - | ND |
|                                    |                     | 6    | +     | +++++ | +     | - | ND |
|                                    |                     | 7    | +     | +++++ | ++    | + | ND |
|                                    |                     | 8    | +++   | ++++  | +++++ | + | ND |
|                                    |                     | 9    | +++++ | +++++ | -     | - | ND |
|                                    | 1 x 10 <sup>7</sup> | 10   | ++    | +++++ | -     | - | ND |
|                                    |                     | 1    | +     | +++++ | +++   | - | ND |
|                                    |                     | 2    | +     | +++++ | +     | - | ND |
|                                    |                     | 3    | +     | +++   | -     | - | ND |
|                                    |                     | 4    | ++    | ++    | ++    | - | ND |
|                                    |                     | 5    | -     | +     | -     | - | ND |

ND – Not done. + Number of positive log10 tubes that were *Salmonella*-positive.

**Table S2.** Cloacal swabs. Vaccinated and unvaccinated chickens were inoculated at week 14 of life and cloacal swabs were taken from all birds on days 3, 6, 9, 12, and 15 post-challenge. In Trial 1, cloacal swabs were also taken on days 2, 4, and 7 post-challenge. Positive/negative results were recorded.

| Number of Trial / <i>Salmonella</i> Strain | Group | Positive Cloacal Swabs / Total Number of Samples |                     |                    |                    |                    |                    |                     |                    | Total                |
|--------------------------------------------|-------|--------------------------------------------------|---------------------|--------------------|--------------------|--------------------|--------------------|---------------------|--------------------|----------------------|
|                                            |       | Day Post-Inoculation                             |                     |                    |                    |                    |                    |                     |                    |                      |
|                                            |       | 2                                                | 3                   | 4                  | 6                  | 7                  | 9                  | 12                  | 15                 |                      |
| Trial 1 <i>Salmonella</i> Enteritidis      | 1     | 27/32 <sup>a</sup>                               | 17/32 <sup>a</sup>  | 4/27 <sup>a</sup>  | 18/27 <sup>a</sup> | 19/22 <sup>a</sup> | 20/22 <sup>a</sup> | 13/17 <sup>a</sup>  | 6/12 <sup>a</sup>  | 124/191 <sup>a</sup> |
|                                            | 2     | 20/32 <sup>b</sup>                               | 9/32 <sup>b</sup>   | 3/27 <sup>a</sup>  | 9/27 <sup>b</sup>  | 7/22 <sup>b</sup>  | 6/22 <sup>b</sup>  | 7/17 <sup>b</sup>   | 2/12 <sup>b</sup>  | 63/191 <sup>b</sup>  |
|                                            | 3     | 27/32 <sup>a</sup>                               | 16/32 <sup>a</sup>  | 6/27 <sup>a</sup>  | 17/27 <sup>a</sup> | 13/22 <sup>c</sup> | 14/22 <sup>c</sup> | 10/17 <sup>ab</sup> | 4/12 <sup>ab</sup> | 107/191 <sup>c</sup> |
|                                            | 4     | 32/32 <sup>c</sup>                               | 12/32 <sup>ab</sup> | 14/27 <sup>b</sup> | 21/27 <sup>c</sup> | 21/22 <sup>a</sup> | 19/22 <sup>a</sup> | 13/17 <sup>a</sup>  | 5/12 <sup>ab</sup> | 140/191 <sup>d</sup> |
| Trial 2 <i>Salmonella</i> Typhimurium      | 1     | ND                                               | 4/30 <sup>a</sup>   | ND                 | 2/24               | ND                 | 1/18 <sup>ab</sup> | 0/12                | 0/6                | 7/90 <sup>a</sup>    |
|                                            | 2     | ND                                               | 5/30 <sup>a</sup>   | ND                 | 2/24               | ND                 | 0/18 <sup>a</sup>  | 0/12                | 0/6                | 7/90 <sup>a</sup>    |
|                                            | 3     | ND                                               | 1/28 <sup>a</sup>   | ND                 | 0/22               | ND                 | 0/16 <sup>a</sup>  | 0/10                | 0/5                | 1/81 <sup>b</sup>    |
|                                            | 4     | ND                                               | 11/30 <sup>b</sup>  | ND                 | 1/24               | ND                 | 4/18 <sup>b</sup>  | 1/12                | 0/6                | 17/90 <sup>c</sup>   |
| Trial 3 <i>Salmonella</i> Infantis         | 1     | ND                                               | 0/30 <sup>a</sup>   | ND                 | 0/24 <sup>a</sup>  | ND                 | 1/18               | 4/12                | 0/12               | 5/90 <sup>a</sup>    |
|                                            | 2     | ND                                               | 1/30 <sup>ab</sup>  | ND                 | 0/24 <sup>a</sup>  | ND                 | 0/18               | 2/12                | 0/12               | 3/90 <sup>a</sup>    |
|                                            | 3     | ND                                               | 3/30 <sup>ab</sup>  | ND                 | 2/24 <sup>a</sup>  | ND                 | 0/18               | 0/12                | 0/12               | 5/90 <sup>a</sup>    |
|                                            | 4     | ND                                               | 7/30 <sup>b</sup>   | ND                 | 9/24 <sup>b</sup>  | ND                 | 4/18               | 2/12                | 1/12               | 23/90 <sup>b</sup>   |

ND – Not done. <sup>a,b,c,d</sup> Isolation rates in the same column (trial) without common superscripts statistically differ using the chi<sup>2</sup> test (P<0.05).

**Table S3.** The number of positive samples of livers, spleens, and caecum contents after challenges at week 14 of life in three experimental infection trials.

| Number of Trial / <i>Salmonella</i> Strain | Group | Day Post-Inoculation |        |                 |       |        |                 |       |        |                 |       |        |                 |       |        |                 |
|--------------------------------------------|-------|----------------------|--------|-----------------|-------|--------|-----------------|-------|--------|-----------------|-------|--------|-----------------|-------|--------|-----------------|
|                                            |       | 3                    |        |                 | 6     |        |                 | 9     |        |                 | 12    |        |                 | 15    |        |                 |
|                                            |       | Liver                | Spleen | Caecum Contents | Liver | Spleen | Caecum Contents | Liver | Spleen | Caecum Contents | Liver | Spleen | Caecum Contents | Liver | Spleen | Caecum Contents |
| Trial 1 <i>Salmonella</i> Enteritidis      | 1     | 3                    | 2      | 5               | 2     | 3      | 5               | 0     | 2      | 4               | 1     | 4      | 3               | 2     | 2      | 3               |
|                                            | 2     | 1                    | 0      | 4               | 2     | 2      | 3               | 2     | 3      | 3               | 0     | 2      | 4               | 2     | 1      | 1               |
|                                            | 3     | 4                    | 4      | 4               | 5     | 5      | 5               | 4     | 4      | 3               | 3     | 5      | 5               | 2     | 4      | 5               |
|                                            | 4     | 5                    | 5      | 5               | 5     | 5      | 5               | 5     | 5      | 4               | 2     | 5      | 5               | 0     | 4      | 4               |
| Trial 2 <i>Salmonella</i> Typhimurium      | 1     | 0                    | 0      | 1               | 0     | 1      | 3               | 0     | 0      | 0               | 1     | 0      | 1               | 0     | 0      | 0               |
|                                            | 2     | 0                    | 0      | 1               | 1     | 0      | 0               | 0     | 0      | 0               | 0     | 0      | 3               | 1     | 0      | 0               |
|                                            | 3     | 0                    | 0      | 0               | 2     | 3      | 3               | 2     | 2      | 0               | 0     | 1      | 3               | 0     | 1      | 0               |
|                                            | 4     | 2                    | 2      | 3               | 2     | 6      | 2               | 6     | 6      | 4               | 0     | 4      | 4               | 0     | 2      | 0               |
| Trial 3 <i>Salmonella</i> Infantis         | 1     | 2                    | 0      | 2               | 1     | 1      | 3               | 0     | 5      | 3               | 0     | 0      | 3               | 0     | 0      | 0               |
|                                            | 2     | 0                    | 1      | 3               | 1     | 1      | 3               | 0     | 5      | 0               | 0     | 1      | 1               | 0     | 0      | 0               |
|                                            | 3     | 2                    | 1      | 2               | 0     | 1      | 0               | 4     | 3      | 1               | 0     | 1      | 1               | 0     | 1      | 2               |
|                                            | 4     | 4                    | 5      | 6               | 4     | 4      | 6               | 3     | 6      | 4               | 2     | 5      | 4               | 0     | 6      | 3               |
